# Supplementary material for: Enhancing mitochondrial activity in neurons protects against neurodegeneration in a mouse model of multiple sclerosis
Source: eLife. 2021 Feb 10;10:e61798. doi: 10.7554/eLife.61798 (PMC7993994; doi:10.7554/eLife.61798)
Supplement: Figure 5—source data 1. [file elife-61798-fig5-data1.xlsx]

## Sheet: score
EAE 1
day	flx/flx							flx/flx X Eno2 Cre
0	0	0	0	0	0	0	0	0	0	0	0	0	0	0	0
1	0	0	0	0	0	0	0	0	0	0	0	0	0	0	0
2	0	0	0	0	0	0	0	0	0	0	0	0	0	0	0
3	0	0	0	0	0	0	0	0	0	0	0	0	0	0	0
4	0	0	0	0	0	0	0	0	0	0	0	0	0	0	0
5	0	0	0	0	0	0	0	0	0	0	0	0	0	0	0
6	0	0	0	0	0	0	0	0	0	0	0	0	0	0	0
7	0	0	0	0	0	0	0	0	0	0	0	0	0	0	0
8	0	1	0	0	0	0	0	0	0	0	0	1	0	0	2.5
9	0	1.75	0	0	0	2.5	2	0	0	0.5	0	1.5	0.5	1	2.5
10	0	1.75	1.5	1.5	0	2.5	2.5	0	0	1.5	1.25	1.5	1.5	1.25	2.5
11	2.25	1.75	2.25	2.5	1.25	3	3	0	0	2.5	2.75	1.5	5	1.25	3
12	3	2.75	2.5	2.25	3	3	3	0	0	2.5	3.5	1.25		1.25	3
13	3	2.75	2.5	1.5	3	3	2.75	1.25	0	2.5	3.5	1.5		1.75	3
14	2.5	2.5	2.5	2.5	3	3	2.75	1.5	0	2.75	3.25	1.75		2	3
15	2.5	2.5	3	1.5	3	3	2.5	1.75	1.75	2.75	3	2		3	2.75
16	2.25	2.5	2.75	1.75	3	4	2.5	1.75	3	2.75	3	2.5		3	2.75
17	2.5	2.5	2.75	2	3		2.5	2	3.5	2.25	2.75	2.75		2.75	2.5
18	2.25	2.5	2.5	2	3		2.5	2	3.5	2	2.75	2.75		3	2.75
19	2	2.5	2.5	1.75	2.25		2.5	2	4	2.5	2.75	2		2.75	3
20	1.5	2.75	2.5	1.25	2.75		2.5	1.5		3	2.75	2		2.75	3
21	1.5	2.75	2	1.25	1.5		2.5	1.5		3	2.25	2.5		2.5	3.5
22	1.5	3	2	1.25	1.5		2.5	1.5		3	1.75	2.5		2.5	3.5
23	1.25	3	1.5	1.25	1.5		2.75	1.75		3	1.5	1.75		2.5	3.5
24	1.25	3	1.25	1.25	1.5		2.75	1.25		2.75	2.25	1.5		2.25	3.5
25	1.75	3	1.5	1.25	1.5		3	1.5		3	2.75	1.5		2.25	3.5
26	1.5	3	2	1	2.75		3	1.5		3	3	1.75		1.75	3.25
27	1.25	3	1.5	1	2.5		3	1.5		3	3.25	3.25		2	3.25
28	1.5	2.75	1.5	0.5	2.5		3	1.5		3	3	3		1.75	3.25
29	1.25	2.5	1.25	1	2.25		2.75	1.5		3	3	3		1.75	3.25
30	1	2.5	1.25	0.5	1.5		2.75	1.5		3	3	3		1.75	3.5
31	1	2.5	1.25	0.5	1.5		2.75	0.5		2.75	2.75	2.5		2.5	3.5
32	1	3	1.25	0	1.5		2.75	0.5		2.5	2.25	2.25		2.5	3
33	1.25	3	1.5	0	1.5		2.5	1.25		2.5	2.25	2.5		2.5	3
34	1	2.75	1.25	0	1.5		2.5	1		2.5	2.25	2.25		2.5	3.5
35	1	2.5	1.25	0	1.5		2.5	1		2.75	2.25	2.25		2.5	3.5
36	1	2.5	1.25	0	1.25		2.5	0.5		2.75	2.25	2.25		2.25	3.25
37	1	2.5	1.25	0	1.25		2.5	0.5		2.75	2.5	2.5		2.25	3.5
38	1	2.5	1	0	1.25		2.5	0.5		2.75	2.5	2.5		2.25	3.25
39	1	2.5	0.5	0.5	2		2.5	1		2.5	2.75	2.25		2.25	3.25
40	0.5	2.5	0.5	0.5	1.5		2.5	0.5		2.75	3	2.25		2.25	3.5
