# Supplementary material for: Enhancing mitochondrial activity in neurons protects against neurodegeneration in a mouse model of multiple sclerosis
Source: eLife. 2021 Feb 10;10:e61798. doi: 10.7554/eLife.61798 (PMC7993994; doi:10.7554/eLife.61798)
Supplement: Figure 5—source data 2. [file elife-61798-fig5-data2.xlsx]

## Sheet: score
EAE 1
day	WT															TT
0	0	0	0	0	0	0	0	0	0	0	0	0	0	0	0	0	0	0	0	0	0	0	0	0	0	0	0	0	0
1	0	0	0	0	0	0	0	0	0	0	0	0	0	0	0	0	0	0	0	0	0	0	0	0	0	0	0	0	0
2	0	0	0	0	0	0	0	0	0	0	0	0	0	0	0	0	0	0	0	0	0	0	0	0	0	0	0	0	0
3	0	0	0	0	0	0	0	0	0	0	0	0	0	0	0	0	0	0	0	0	0	0	0	0	0	0	0	0	0
4	0	0	0	0	0	0	0	0	0	0	0	0	0	0	0	0	0	0	0	0	0	0	0	0	0	0	0	0	0
5	0	0	0	0	0	0	0	0	0	0	0	0	0	0	0	0	0	0	0	0	0	0	0	0	0	0	0	0	0
6	0	0	0	0	0	0	0	0	0	0	0	0	0	0	0	0	0	0	0	0	0	0	0	0	0	0	0	0	0
7	0.5	0	0	0	0	0	0	0	0.5	0	0	0	0	0	0	0	0	0.5	0	0	0.5	0	0	0	0.5	0	0	0	0
8	0.5	0	0.5	0	0	0.5	0	0.5	0.5	0	0	0	0	0	0.5	0	0	0.5	0.5	0	0.5	1	0	0.5	0.5	0.5	0	0	0.5
9	1.25	0	0	0	0	0	0	0.5	0.5	0	0.5	0	0	0	0	0.5	0	0	0.5	0	0.5	1.5	0.5	0	0.5	0.5	0.5	1.25	1
10	2	1.5	1.5	0.5	0.5	0.5	0	2.25	1.25	1.25	1	2	1.5	0	1	1.25	1	0.5	1.5	0.5	0.5	2.25	1.25	1	1.25	0.5	1.25	1.5	1.25
11	3.25	2.25	2	1.75	1.5	2.25	1	3	1	1.25	1.5	3.25	1.75	2.25	1.25	2.5	1	1	2.25	1.25	1.25	2.75	1	1.5	1.75	0	2.5	2.25	5
12	3.5	2.5	2.5	2.5	0.5	2.5	1	2.75	1.5	2.25	3	3.5	2.25	2.25	1	2.75	1	0	3.5	2.25	2.5	3.25	0	2.75	2.25	1.5	2.5	3.25
13	3.5	2.75	2.5	2.75	1.5	2.75	1.75	2.75	2.75	2.75	2.75	3.5	1.5	2.75	2.25	2.5	1.5	0	3.5	1.5	2.75	2.75	1.5	2.75	3.35	2.5	0.5	3.25
14	2.75	2.75	2	3	3.5	2.5	3	3	2.75	2.75	2.75	2.75	1.75	2.75	2.25	1.75	2.75	0	2.75	1.75	2.5	2.75	2.5	2.75	2.75	2.5	2.75	3.25
15	2.75	2.5	2.25	2.75	3.5	2.5	3	2.75	2.75	2.75	3	3	1.5	2.75	2.75	1.5	3.5	0	2.75	2.5	2.25	2.75	3.5	2.5	2.75	1.75	3.25	2.75
16	2.75	1.5	2.5	2.5	3	1.5	2.75	2.75	2.5	2.5	2.75	5	1	2.5	2.5	1.5	3.25	0	2.75	1.5	1.5	2.75	3.5	2.5	2.5	1.5	2.75	2.5
17	2.75	1.75	1	2.25	2.75	1.5	2.5	2.5	1.5	3	3		1.5	2.5	2.5	1	2.75	0.5	2.5	1	1.5	2.5	3.25	2.75	2.75	1.75	2.75	2.75
18	2.5	1	1	2.5	2	1	1	2.75	2	2.75	3.25		1	1.5	2.5	1.5	2	0	2.5	1	1	2.5	3	2.75	2.75	0.5	2.5	2.75
19	2.5	1.5	1.5	2	2	1	1.5	2	1.5	2.75	3		1	1.5	2.75	1.5	2.25	0	2.5	1	1.5	2.5	2.75	2.5	2.75	1	2.5	2.75
20	2.5	1.5	1.75	2.25	2	1	1.5	2.25	1.75	2.75	3		1	1.5	2.75	1.25	2.5	0	2.5	1	1.25	2.5	2.5	2.5	2.75	1	2.5	2.75
21	2.25	1.5	1.5	1.5	1.5	1	1.5	2.25	1.5	2.75	2.75		1	1.5	2.75	1	1.75	0	2.5	1	1	2.5	2.5	2.5	2.75	1	2.5	2.75
22	1.5	1	1	2	1	1	1	2.5	1.5	2.75	2.5		1	2.25	2.75	1.5	1	1	2.5	1	1	2.5	2.5	2.5	2.75	1	2.25	0.5
23	1	1.5	1.5	1	1.5	1.5	1.5	1.5	1.5	2.75	2.5		1	1.5	2.5	1	0.5	1	1.5	1.5	1	0.5	2.5	2.5	2.5	1	1.75	2.5
24	1.5	1	1.5	1	1.5	1.5	1	1.5	1.5	2.5	1.75		1	1	2.5	1	1	1	1	1	1	2.25	1.5	2.5	2.5	1	1.5	2.5
25	1.5	1.5	1.5	1.5	1	1	1.5	1.5	1	2.5	2.5		0.5	1	2.5	1	0.5	0.5	1.5	0.5	1	1.5	2	2.5	2.5	0.5	1	1.75
26	1.5	1.5	1.5	1.5	1.5	0.5	1	1.5	1	2.5	2.5		0.5	1	2.5	1	1	0.5	1.5	0.5	0.5	1.5	1.5	2.5	2.5	0.5	1	2
27	1	1	1.5	1.5	1	0.5	1	1.75	1.25	2.5	2.5		1	1.5	2.5	0.5	1	0.5	1	0.5	0.5	1.75	1.5	1.5	2.5	0.5	2	2.5
28	1.5	1	1.5	3.25	1.5	1	1.5	1.5	1	2	2.5		0.5	1.5	2	1	1	0.5	1.5	0.5	1	1.5	1.5	1.5	2.5	0.5	1.5	3
29	1	1.5	1	3	1.5	1	1	1.5	1	2	1.75		0	1.5	2.5	0.5	1	0.5	1	0.5	1	1.5	1.5	1.5	2	0.5	1	3
30	1.5	1	1.5	2.75	1	0.5	1	1.75	1	2.5	2.5		0	1.5	2.5	0	1	1	1	0	1	1.5	1	1.5	2.5	0	0.5	2.75
31	1	1	1	2.5	1	0.5	1.5	1.75	1	2.5	2.5		0.5	1	2.5	0.5	1	0.5	1	0.5	0.5	1.5	1.5	1.5	2.25	0	1	2.25
32	1.5	1	1	1.75	1	0.5	1	1.5	1	1.75	2.5		1	1.5	2.25	1	1.5	0.5	1.5	0.5	1	1.5	1	0.5	2.25	0.5	0.5	2.5
33	1.5	1	1	2	1	0.5	1	1.5	1	2	2.5		1	1.5	2.5	1	1.25	0.5	1.5	0.5	1	1.5	1	1	2.5	0.5	0.5	2.5
34	1.5	1	1	2.25	1	0.5	1	1.5	1	2.25	2.5		1	1.5	2.5	0.5	1.25	0.5	1.25	0.5	1	1.75	1.25	1.5	2.5	0.5	1	2.25
35	1.5	1	1	2.5	1	0.5	1	1.75	1	2.5	2.5		1	1	2.5	1	1	0.5	1.25	0.5	1	2	1	1	2.5	0.5	0.5	2.5
36	1.5	1.5	1	3	1	0.5	1	2.5	1	2	1.5		1	1.5	2.75	0.5	1	0	1	1	1	1.5	1	1	2.5	0.5	0.5	1.75
37	1.5	1	1.5	2.75	1.5	1	1	2.5	1	2	1.5		0.5	1	2.75	1.5	1	0.5	1	1	1	1.5	1	1.5	2.5	5	1	1.75
38	1.5	1.5	1.5	3.25	1	0.5	0.5	1.5	1	2	1.5		0.5	1	2.75	1.5	1	0.5	1	0.5	0.5	1.5	1.5	1.5	2.5		1	1.5
39	1	1	1	2.75	1	1	0.5	1.5	1	2.5	1.5		0	1	2.25	1.5	1	0.5	1	0.5	0.5	1.5	1	1.25	2.5		1	1.5
40	1	1	1	2.75	1	0.5	0.5	2	1	2.5	1.25		0	1	2.25	0.5	1	0	1	0.5	0.5	1.75	0.5	1.5	2.5		1	1.75
EAE 2
day	WT												TT
0	0	0	0	0	0	0	0	0	0	0	0	0	0	0	0	0	0	0	0	0	0
1	0	0	0	0	0	0	0	0	0	0	0	0	0	0	0	0	0	0	0	0	0
2	0	0	0	0	0	0	0	0	0	0	0	0	0	0	0	0	0	0	0	0	0
3	0	0	0	0	0	0	0	0	0	0	0	0	0	0	0	0	0	0	0	0	0
4	0	0	0	0	0	0	0	0	0	0	0	0	0	0	0	0	0	0	0	0	0
5	0	0	0	0	0	0	0	0	0	0	0	0	0	0	0	0	0	0	0	0	0
6	0	0	0	0	0	0	0	0	0	0	0	0	0	0	0	0	0	0	0	0	0
7	0	0	0	0	0	0	0	0	0	0	0	0	0	0	0	0	0	0	0	0	0
8	0	0	0	0	0	0	0	0	1.25	2	0	0	0	0	1.25	0	0	0	0	0	0
9	0	0	0	0	0	0	0	0	1.25	3.5	0	0	0	0	1.25	0	0	0	0	0	0
10	0	0	0	0	0	0	0	0.5	1.5	3.5	0	0	0	0	1	0	0	0	0	1	0.5
11	0	1	0	0	0	0	0	1.25	2.75	3	1	0	0	0	1	1.25	0	0	1.5	2.5	2
12	0	3.5	0	0	0	0	0	2	3	3	2.5	0	0	0	0	2.5	0	0	2.5	3.5	3.25
13	0	3.5	0	0	0	0	1.75	2	3	3	2.5	2	0	0	0	1.5	0	0	2.5	3.5	3.25
14	0	3.5	0	0	0	0	2.5	2.25	3	3.25	3	2.5	0	0	0	1.5	0	0	2.5	3	3
15	0	3.5	0	0	0	0	2.75	2	2.75	3	2.75	2.75	0	0	0	1.5	0	0	2.5	3.25	3
16	0	3.5	2.5	0	0	0	2.75	2	2.75	2.75	2.5	3	0	0	0	1.5	0	0	2.5	3.25	3
17	0	3.5	2	3	0	0	2.75	1.75	2.5	2.75	2.5	3	0	0	0	1.5	0	0	2.5	3	3
18	0	3.5	1.25	2.5	0	0	2.75	1.5	2.5	2.75	2.25	3	0	0	0	1.5	0	0	2.5	3.25	2.75
19	0	3.5	0	2.5	0	0	2.75	1	2.5	2.75	2.5	2.75	0	0	0	1.25	0	0	2.5	3.5	2.75
20	0	3.5	0	2.25	0	0	2.5	1	2.25	2.75	2.5	2.25	0	0	0	1	0	0	2.5	3.5	3
21	0	3.5	0	2.25	0	0	2.5	1	2.25	2.75	2.5	2.5	0	0	0	1.25	0	0	2.25	3	3
22	0	3.25	0	2	0	0	2.5	1	2	2.75	2.5	2.25	0	0	0	1.25	0	0	2.5	3	3
23	0	3	0	2.25	0	0	2.5	1.25	2.25	2.75	2.5	2	0.5	0	0	1.25	0	0	2.5	3	3
24	0	3	0	2	0	0	2.5	1	2	2.75	2.5	1.75	0	0	0	1.25	0	0	2.5	3	3
25	0	3	0	2.25	0.5	0	2	1	1.75	2.75	2.5	2.5	0.5	0	0	1.25	0	0	2.5	3	3
26	0	3	0	1.75	0.5	0	1.75	1.5	1.5	2.5	1.75	3	0	0	0	1	0	0	1.5	3	2.75
27	0	3	0.5	1.75	0.5	0	2.5	1.5	1.75	2.5	1.75	3	0.5	0	0	1.25	0	0	1.75	2.5	2.75
28	0.5	3	0	1.75	0.5	0.5	2.5	1.25	1.75	2.5	1.75	3	0.5	0	0	1.25	0	0	1.5	3	2.75
29	0	3	0.5	1.5	1	0.5	2.5	1.25	1.5	2.5	1.5	2.5	0.5	0	0	1.25	0	0	1.5	3.25	3.25
30	0.5	3	0.5	1.5	0.5	0.5	2.5	2	1.5	2.5	1.75	2.25	0.5	0	0	1	0	0	1.75	3	3.25
31	0.5	3	0.5	1.5	0.5	0	2.25	2	1.5	2.5	1.75	2.75	0	0	0	0.5	0	0	1.75	3	3.25
32	0.5	3	0.5	1.5	0.5	0	2.25	2	1.5	2.5	1.75	2.75	0	0	0	0.5	0	0	1.5	3	3.25
33	0.5	3	0.5	1.75	1.25	0	2.25	2	1.5	2.5	1.75	2.25	0	0	0	1	0	0	1.5	2.75	3.25
34	0	3	0.5	1.5	1.5	0.5	2.25	2	1.5	2.75	1.5	2.25	0.5	0	0	1.25	0	0	1.25	2.75	3
35	0	3	0.5	1.5	1.5	0.5	2	2.25	1.75	3	1.5	2.5	0.5	0	0	1.25	0.5	0	1.75	2.75	3
36	0	3	0.5	1.5	1.25	0	2.25	2	1.5	3	1.5	2.25	1	0.5	0	1	0	0	1.5	2.75	3
37	0	3	0.5	1.25	1.25	0.5	2	2	1.75	3	1.5	2	0.5	0.5	0	1.25	0	0	1.25	3	3
38	0	3	0.5	1.5	1	0	2	1.75	1.5	3	1.75	2	0.5	0	0	1	0	0	1.25	3	3
39	0	3	0.5	1.5	1.25	0	2	1.75	1.5	3	1.75	2.25	0.5	0	0	0.5	0	0	1.25	3	3
40	0	3	0	1.5	1.25	0	2.25	1.75	1.5	3	1.75	2.25	0.5	0	0	0.5	0	0	1	3	3
EAE 3
day	WT										TT
0	0	0	0	0	0	0	0	0	0	0	0	0	0	0	0	0	0	0
1	0	0	0	0	0	0	0	0	0	0	0	0	0	0	0	0	0	0
2	0	0	0	0	0	0	0	0	0	0	0	0	0	0	0	0	0	0
3	0	0	0	0	0	0	0	0	0	0	0	0	0	0	0	0	0	0
4	0	0	0	0	0	0	0	0	0	0	0	0	0	0	0	0	0	0
5	0	0	0	0	0	0	0	0	0	0	0	0	0	0	0	0	0	0
6	0	0	0	0	0	0	0	0	0	0	0	0	0	0	0	0	0	0
7	0	0	0	0	0	0	0	0	0	0	0	0	0	0	0	0	0	0
8	0	0	0	0	0	0	0	0	0	0	0	0	0	0	0	0	0	0
9	0	0	0	0	0	0	0	0	0	0	0	0	0	0	0	0	0	0
10	0.5	0.5	0	0	0	0	0	0.5	0	0	0	0	1.5	0.5	0	0.5	0	0
11	0.5	0.5	0.5	0.5	5	0	0	0.5	1	0	5	0	2.5	1.25	0	0	0	1.5
12	0.5	0.5	0	1.25		0.5	1.25	1.25	3	0		0	3.25	2.5	1.75	0.5	1	2.25
13	0.5	1.25	0.5	1.5		1.5	1.5	1.25	3	0		5	3	2.75	2.75	5	1.25	2.5
14	1	1.25	2.5	3		2	2.5	1.25	3	1.5			2.75	2.75	2.75		1.5	1.75
15	1.75	2.5	3.25	3		2.5	2.5	1.25	2.75	2			2.75	3	2.75		2.5	1.5
16	3	2.25	2.5	3		2.5	2.5	1.25	2.5	2.5			2.75	3	2.75		1.5	1.5
17	2.75	2.5	2.5	2.75		2.5	2.5	1	2	2.75			3	3	3		2.5	1.25
18	2.75	2.25	2.75	3		2.75	2.75	1	2	3			3	3	3.25		2.75	1.25
19	3	2	2.75	3		2.75	3	0.5	2	3			3.25	3	3.25		3	1.25
20	3	2.5	2.75	2.75		1.75	2.75	1	1.75	3			3	2.5	3		3	1.25
21	3	2.5	2.5	2.75		1.5	2.5	1.75	2.5	2.75			3	2.5	3		2.5	1.25
22	2.75	2.5	2.5	2.75		1.5	2.75	2.25	2.25	2.75			3	2.5	3		1.5	2
23	2.5	2.5	2.5	2.75		1.25	2.75	2.5	2.5	2			3	2.5	3		1.5	0.5
24	2.75	2.5	2.75	2.5		1.25	2.75	2.5	2.5	2.25			3	2	3		1.5	0.5
25	2.5	2.5	2.5	2.5		1.25	2.5	2.5	2.75	1.5			3	2.5	2.75		1.25	0.5
26	2.25	2	2.5	2.5		1.25	2.5	2.25	2.5	1.5			3	2	2.75		1.25	0.5
27	2.5	2.5	2.5	2.5		1.25	2.75	1.75	2.5	1.75			2.75	1.5	2.75		1.25	0.5
28	2.5	3	2.5	2.75		1.25	2.75	1.75	2.5	1.75			2.75	1.5	2.75		1	0.5
29	2.25	2.75	2.75	2.75		1.25	2.5	2	2.5	1.75			2.5	1.25	2.5		1.25	0.5
30	2.5	2.75	3.5	3		1.25	2.5	2	2.75	1.75			2.5	1.25	2.5		1	0.5
31	2.5	2.75	3.5	3		1.25	2.5	2.25	2.5	1.75			2.5	1.25	2.5		1	0
32	2.25	2.75	4	2.5		1.25	2.5	1.75	2.5	1.75			2.5	1.25	2.5		1	0
33	2.75	2.75		2.75		1.25	2.5	2	2.5	1.75			2.75	1.25	2.5		0.5	0
34	3	2.75		2.75		1.25	2.5	2	3	1.75			2.5	1	2.5		0	0
35	3	2.75		2.75		1.25	2.5	1.5	3	1.5			2.5	1	2		0	0
36	3	2.5		2.75		1.5	2.5	1.5	3	1.5			2.25	0.5	1.75		0	0
37	3	2.75		3		1.25	2.5	1.5	3	1.25			2.25	1	2.25		0.5	0.5
38	3	2.5		2.75		1.25	2.5	1.25	3	1.5			2.25	0.5	2.25		0.5	0.5
39	2.75	2.75		2.75		1.25	2.5	1.25	2.75	1.5			2.25	0.5	2.25		0.5	0.5
40	2.75	2.75		2.75		1.25	2.25	1.25	2.75	1.5			2.25	0.5	2.25		0.5	0.5
